# Supplementary material for: Mining of Cyanobacterial Genomes Indicates Natural Product Biosynthetic Gene Clusters Located in Conjugative Plasmids
Source: Front Microbiol. 2021 Nov 4;12:684565. doi: 10.3389/fmicb.2021.684565 (PMC8600333; doi:10.3389/fmicb.2021.684565)
Supplement: Supplementary Table 2 — Annotation of 4-phosphopantetheinyl transferases in the analyzed cyanobacterial genomes. See the “Materials and Methods” section for further information. [file Table_2.XLSX]

## Sheet: PTT
Genomes							Identified PPT				Similarity to Sfp (WP_002185911.1)			Similarity to AcpS (NP_388343.1)			Predicted PPT
Organism	Assembly	Release date	Size (Mbp)	GC%	Scaffolds	Genes	PPTs	Replicon	Lengh (aa)	Acession No	Cover (%)	E-value	Identity (%)	Cover (%)2	E-value2	Identity (%)2	Type
Candidatus Melainabacteria bacterium MEL.A1	GCA_001765415.1	2016-10-13	1 ,87	32 ,90	1	1838	0	-	-	-	-	-	-	-	-	-	-
Cyanobacterium stanieri PCC 7202	GCA_000317655.1	2012-12-07	3 ,16	38 ,70	1	2941	0	-	-	-	-	-	-	-	-	-	-
Geitlerinema sp. PCC 7407	GCA_000317045.1	2012-12-05	4 ,68	58 ,50	1	3893	0	-	-	-	-	-	-	-	-	-	-
Halothece sp. PCC 7418	GCA_000317635.1	2012-12-07	4 ,18	42 ,90	1	3884	0	-	-	-	-	-	-	-	-	-	-
Leptolyngbya sp. NIES-3755	GCA_001548435.1	2015-12-09	6 ,76	46 ,66	4	6603	0	-	-	-	-	-	-	-	-	-	-
Nostoc piscinale CENA21	GCA_001298445.1	2015-09-24	7 ,09	40 ,50	1	6159	0	-	-	-	-	-	-	-	-	-	-
Prochlorococcus marinus str. AS9601	GCA_000015645.1	2007-01-19	1 ,67	31 ,30	1	1844	0	-	-	-	-	-	-	-	-	-	-
Prochlorococcus marinus str. MIT 9211	GCA_000018585.1	2007-11-13	1 ,69	38 ,00	1	1816	0	-	-	-	-	-	-	-	-	-	-
Prochlorococcus marinus str. MIT 9215	GCA_000018065.1	2007-09-20	1 ,74	31 ,10	1	2055	0	-	-	-	-	-	-	-	-	-	-
Prochlorococcus marinus str. MIT 9301	GCA_000015965.1	2007-03-05	1 ,64	31 ,30	1	1839	0	-	-	-	-	-	-	-	-	-	-
Prochlorococcus marinus str. MIT 9303	GCA_000015705.1	2007-01-22	2 ,68	50 ,00	1	3136	0	-	-	-	-	-	-	-	-	-	-
Prochlorococcus marinus str. MIT 9312	GCA_000012645.1	2005-11-02	1 ,71	31 ,20	1	1868	0	-	-	-	-	-	-	-	-	-	-
Prochlorococcus marinus str. MIT 9313	GCA_000011485.1	2003-08-14	2 ,41	50 ,70	1	2430	1	Chromossome	217	CAE21796.1	37	1e-05	25.61	-	-	-	Sfp
Prochlorococcus marinus str. MIT 9515	GCA_000015665.1	2007-01-19	1 ,70	30 ,80	1	1856	0	-	-	-	-	-	-	-	-	-	-
Prochlorococcus marinus str. NATL1A	GCA_000015685.1	2007-01-22	1 ,86	35 ,00	1	2059	0	-	-	-	-	-	-	-	-	-	-
Prochlorococcus marinus str. NATL2A	GCA_000012465.1	2005-08-09	1 ,84	35 ,10	1	2010	0	-	-	-	-	-	-	-	-	-	-
Prochlorococcus marinus subsp. marinus str. CCMP1375	GCA_000007925.1	2003-07-25	1 ,75	36 ,40	1	1930	1	Chromossome	218	AAP99138.1	57	1e-08	20.42	-	-	-	Sfp
Prochlorococcus marinus subsp. pastoris str. CCMP1986	GCA_000011465.1	2003-08-14	1 ,66	30 ,80	1	1849	0	-	-	-	-	-	-	-	-	-	-
Prochlorococcus sp. RS01	GCA_001989435.1	2017-02-07	1 ,66	31 ,40	1	1844	0	-	-	-	-	-	-	-	-	-	-
Prochlorococcus sp. RS04	GCA_001989455.1	2017-02-07	1 ,66	31 ,40	1	1844	0	-	-	-	-	-	-	-	-	-	-
Prochlorococcus sp. RS50	GCA_001989415.1	2017-02-07	1 ,66	31 ,40	1	1842	0	-	-	-	-	-	-	-	-	-	-
Synechococcus elongatus PCC 11801	GCA_003846445.1	2018-11-28	2 ,69	54 ,90	1	2678	0	-	-	-	-	-	-	-	-	-	-
Synechococcus lividus PCC 6715	GCA_002754935.1	2017-11-06	2 ,66	53 ,50	1	2592	0	-	-	-	-	-	-	-	-	-	-
Synechococcus sp. CC9311	GCA_000014585.1	2006-09-01	2 ,61	52 ,40	1	2717	0	-	-	-	-	-	-	-	-	-	-
Synechococcus sp. RCC307	GCA_000063525.1	2007-05-19	2 ,22	60 ,80	1	2457	0	-	-	-	-	-	-	-	-	-	-
Synechococcus sp. WH 7803	GCA_000063505.1	2007-05-19	2 ,37	60 ,20	1	2528	0	-	-	-	-	-	-	-	-	-	-
Synechococcus sp. WH 8101	GCA_004209775.1	2019-02-19	2 ,63	63 ,30	1	2787	0	-	-	-	-	-	-	-	-	-	-
Synechococcus sp. WH 8102	GCA_000195975.1	2003-08-14	2 ,43	59 ,40	1	2630	0	-	-	-	-	-	-	-	-	-	-
Thermosynechococcus elongatus BP-1	GCA_000011345.1	2002-08-17	2 ,59	53 ,90	1	2525	0	-	-	-	-	-	-	-	-	-	-
Thermosynechococcus elongatus PKUAC-SCTE542	GCA_003555505.1	2018-09-13	2 ,65	53 ,30	1	2617	0	-	-	-	-	-	-	-	-	-	-
Anabaena cylindrica PCC 7122	GCA_002367955.1	2017-06-24	7 ,03	38 ,82	6	6158	1	Chromossome	239	WP_015216311.1	73	1e-24	32.61	47	9e-05	27.78	Sfp
Anabaena sp. 90	GCA_000312705.1	2012-11-13	5 ,31	38 ,09	5	4940	1	Chromossome	239	WP_148279013.1	87	3e-22	26.46	68	3e-05	23.42	Sfp
Anabaena sp. WA102	GCA_001277295.1	2015-09-01	5 ,78	38 ,38	2	5370	1	Chromossome	240	WP_053538345.1	79	4e-22	28.28	60	1e-05	25.23	Sfp
Anabaena sp. YBS01	GCA_009498015.1	2019-11-04	7 ,01	41 ,40	1	5890	1	Chromossome	237	WP_011319364.1	72	3e-24	32.40	28	3e-06	30.67	Sfp
Anabaenopsis circularis NIES-21	GCA_002367975.1	2017-06-24	7 ,07	40 ,52	4	6068	1	Chromossome	243	WP_096581236.1	87	4e-22	29.69	31	7e-05	25.61	Sfp
Arthrospira platensis C1	GCA_000307915.1	2012-09-24	6 ,09	44 ,75	1	11674	1	Chromossome	232	WP_006623667.1	76	3e-20	29.38	31	6e-08	25.61	Sfp
Arthrospira platensis NIES-39	GCA_000210375.1	2010-03-25	6 ,79	44 ,30	1	6626	1	Chromossome	231	WP_006620109.1	79	6e-20	29.31	33	3e-07	23.53	Sfp
Arthrospira platensis YZ	GCA_001611905.1	2016-04-06	6 ,52	44 ,20	1	6248	1	Chromossome	231	WP_006620109.1	79	6e-20	29.31	33	3e-07	23.53	Sfp
Aulosira laxa NIES-50	GCA_002368055.1	2017-06-24	9 ,35	40 ,70	7	7463	1	Chromossome	244	WP_096577685.1	77	1e-19	29.80	41	2e-05	23.42	Sfp
Calothrix brevissima NIES-22	GCA_002367995.1	2017-06-24	9 ,26	40 ,51	9	7410	1	Chromossome	241	WP_096644282.1	83	1e-25	30.63	58	3e-05	24.39	Sfp
Calothrix parasitica NIES-267	GCA_002368095.1	2017-06-24	9 ,49	36 ,84	6	7420	1	Chromossome	241	WP_096657115.1	78	3e-24	29.35	53	0.0003	25	Sfp
Calothrix sp. 336/3	GCA_000734895.2	2015-05-06	6 ,42	41 ,06	4	5386	1	Chromossome	222	WP_046814866.1	92	5e-18	28.04	46	0.0001	23.44	Sfp
Calothrix sp. NIES-2098	GCA_002368175.1	2017-06-24	8 ,88	41 ,18	2	7386	1	Chromossome	239	WP_096589040.1	88	6e-30	31.86	61	9e-06	26.83	Sfp
Calothrix sp. NIES-2100	GCA_002368195.1	2017-06-24	9 ,96	41 ,50	2	8011	1	Chromossome	241	WP_096596977.1	86	2e-22	28.83	72	3e-05	23.17	Sfp
Calothrix sp. NIES-3974	GCA_002368395.1	2017-06-24	5 ,99	41 ,50	1	4730	1	Chromossome	248	WP_096620392.1	68	1e-24	29.94	70	5e-06	26.25	Sfp
Calothrix sp. NIES-4071	GCA_002368455.1	2017-06-24	12 ,05	39 ,04	9	10691	1	Chromossome	249	WP_096688604.1	75	7e-23	27.72	65	6e-05	25	Sfp
Calothrix sp. NIES-4101	GCA_004296455.1	2017-06-24	7 ,59	39 ,65	6	6502	1	Chromossome	248	BAZ38832.1	78	2e-25	30.14	36	7e-06	25.51	Sfp
Calothrix sp. NIES-4105	GCA_002368415.1	2017-06-24	12 ,04	39 ,05	8	10671	1	Chromossome	249	WP_096688604.1	75	7e-23	27.72	65	6e-05	25	Sfp
Calothrix sp. PCC 7507	GCA_000316575.1	2012-12-04	7 ,02	42 ,20	1	6120	1	Chromossome	234	WP_015127290.1	90	2e-21	30.40	57	0.0001	31.34	Sfp
Candidatus Atelocyanobacterium thalassa isolate ALOHA	GCA_000025125.1	2010-01-28	1 ,44	31 ,10	1	1214	1	Chromossome	236	WP_012953878.1	71	3e-27	31.82	43	6e-06	26.36	Sfp
Chamaesiphon minutus PCC 6605	GCA_000317145.1	2012-12-05	6 ,76	45 ,65	3	6384	1	Chromossome	244	WP_015162725.1	88	4e-16	25.12	59	3e-06	23.89	Sfp
Chondrocystis sp. NIES-4102	GCA_002368355.1	2017-06-24	5 ,00	36 ,60	7	4367	1	Chromossome	249	WP_096723726.1	87	3e-26	28.95	57	3e-08	29.82	Sfp
Crinalium epipsammum PCC 9333	GCA_000317495.1	2012-12-06	5 ,62	40 ,20	9	5031	1	Chromossome	249	WP_015205257.1	95	1e-30	26.91	55	6e-07	28.57	Sfp
Crocosphaera subtropica ATCC 51142	GCA_000017845.1	2008-04-01	5 ,46	37 ,97	6	5042	1	Chromossome	241	WP_009544762.1	92	8e-24	27.35	44	9e-08	32.84	Sfp
Cyanobacterium aponinum PCC 10605	GCA_000317675.1	2012-12-07	4 ,18	34 ,97	2	3580	1	Chromossome	249	WP_015219675.1	55	8e-17	28.95	26	0.001	24.29	Sfp
cyanobacterium endosymbiont of Epithemia turgida isolate EtSB Lake Yunoko	GCA_000829235.1	2014-07-23	2 ,79	33 ,40	1	1819	1	Chromossome	238	WP_044106133.1	95	3e-20	26.20	34	2e-05	32.18	Sfp
cyanobacterium endosymbiont of Rhopalodia gibberula	GCA_003574135.1	2017-10-17	3 ,02	33 ,90	1	1956	1	Chromossome	242	WP_119259745.1	92	5e-21	26.18	37	4e-05	28.21	Sfp
Cyanobacterium sp. HL-69	GCA_002813895.1	2017-12-07	3 ,30	37 ,66	3	3099	1	Chromossome	226	AUC61350.1	86	3e-17	23.19	55	1e-05	26.88	Sfp
Cyanobium gracile PCC 6307	GCA_000316515.1	2012-12-04	3 ,34	68 ,70	1	3404	1	Chromossome	262	WP_083891440.1	68	4e-27	34.94	22	0.0001	25	Sfp
Cyanobium sp. NIES-981	GCA_900088535.1	2016-06-02	3 ,02	68 ,60	1	3049	1	Chromossome	190	WP_157665389.1	76	9e-24	35.95	32	0.003	26.15	Sfp
Cyanothece sp. PCC 7425	GCA_000022045.1	2009-01-09	5 ,79	50 ,66	4	5402	1	Chromossome	235	WP_012626130.1	78	2e-21	30.64	31	0.16	19.12	Sfp
Cylindrospermum sp. NIES-4074	GCA_003994795.1	2017-06-24	7 ,70	42 ,00	5	6620	1	Chromossome	241	WP_096657115.1	78	3e-24	29.35	53	0.0003	25	Sfp
Cylindrospermum stagnale PCC 7417	GCA_000317535.1	2012-12-06	7 ,61	42 ,20	4	6528	1	Chromossome	242	WP_015207990.1	92	2e-23	29.52	52	1e-06	31.82	Sfp
Dactylococcopsis salina PCC 8305	GCA_000317615.1	2012-12-07	3 ,78	42 ,40	1	3701	1	Chromossome	237	WP_156800881.1	81	8e-29	31.48	29	5e-06	26.32	Sfp
Dolichospermum compactum NIES-806	GCA_002368115.1	2017-06-24	5 ,17	38 ,20	1	4785	1	Chromossome	236	WP_096666282.1	88	6e-22	26.46	61	9e-06	24.32	Sfp
Dolichospermum sp. UHCC 0315A	GCA_008121535.1	2019-08-28	5 ,64	38 ,19	4	5278	1	Chromossome	238	WP_148766409.1	87	5e-22	26.46	65	1e-05	24.32	Sfp
Euhalothece natronophila Z-M001	GCA_007904085.1	2019-08-08	3 ,52	40 ,97	5	3466	1	Chromossome	218	WP_146294712.1	72	2e-24	35.86	47	4e-07	23.64	Sfp
Fischerella sp. NIES-3754	GCA_001548455.1	2015-12-05	5 ,83	40 ,99	3	4911	1	Chromossome	240	WP_062247983.1	80	1e-25	31.10	61	1e-05	24.39	Sfp
Fischerella sp. NIES-4106	GCA_002368315.1	2017-06-24	7 ,25	40 ,04	9	6183	1	Chromossome	240	WP_096676943.1	80	5e-23	29.67	32	1e-05	25.61	Sfp
Fremyella diplosiphon NIES-3275	GCA_002368275.1	2017-06-24	10 ,13	40 ,75	15	8157	1	Chromossome	244	WP_045872771.1	77	7e-21	29.44	27	5e-06	26.67	Sfp
Geminocystis herdmanii PCC 6308	GCA_000332235.1	2013-01-17	4 ,26	34 ,30	1	4127	1	Chromossome	248	WP_017294947.1	87	1e-19	25.11	56	9e-05	23.88	Sfp
Geminocystis sp. NIES-3708	GCA_001548095.1	2015-03-18	4 ,04	32 ,30	6	3578	1	Chromossome	243	WP_066344362.1	88	3e-25	26.67	25	5e-07	26.15	Sfp
Geminocystis sp. NIES-3709	GCA_001548115.1	2015-03-18	4 ,43	33 ,32	12	3799	1	Chromossome	222	WP_066116195.1	79	3e-24	29.21	45	0.0001	25.76	Sfp
Gloeobacter kilaueensis JS1	GCA_000484535.1	2013-10-28	4 ,72	60 ,50	1	4511	1	Chromossome	248	WP_023173204.1	61	6e-19	33.77	64	0.004	20	Sfp
Gloeobacter violaceus PCC 7421	GCA_000011385.1	2003-09-25	4 ,66	62 ,00	1	4482	1	Chromossome	255	NP_924897.1	73	7e-28	33.68	12	0.009	33.33	Sfp
Gloeocapsa sp. PCC 7428	GCA_000317555.1	2012-12-06	5 ,88	43 ,39	5	5238	1	Chromossome	253	WP_015186867.1	94	5e-29	27.63	32	0.005	30.19	Sfp
Gloeomargarita lithophora Alchichica-D10	GCA_001870225.1	2016-11-07	3 ,05	52 ,20	1	3084	1	Chromossome	164	WP_157776120.1	54	3e-13	35.87	49	9e-09	25.76	Sfp
Gloeothece citriformis PCC 7424	GCA_000021825.1	2008-12-17	6 ,55	38 ,50	7	5843	1	Chromossome	240	WP_041238479.1	92	1e-23	26.92	37	3e-06	29.27	Sfp
Gloeothece verrucosa PCC 7822	GCA_000147335.1	2010-09-15	7 ,84	39 ,87	7	6968	1	Chromossome	237	WP_157871928.1	93	4e-21	27.43	25	5e-05	39.06	Sfp
Leptolyngbya boryana dg5	GCA_002142495.1	2015-02-14	6 ,80	47 ,01	4	6327	1	Chromossome	222	WP_017286635.1	69	1e-18	28	12	0.0001	43.33	Sfp
Leptolyngbya boryana IAM M-101	GCA_002142475.1	2015-02-14	6 ,80	47 ,01	4	6327	1	Chromossome	222	WP_017286635.1	69	1e-18	28	12	0.0001	43.33	Sfp
Leptolyngbya boryana NIES-2135	GCA_002368255.1	2017-06-24	7 ,23	47 ,01	4	6757	1	Chromossome	222	WP_017286635.1	69	1e-18	28	12	0.0001	43.33	Sfp
Leptolyngbya sp. O-77	GCA_001548395.1	2016-01-29	5 ,48	55 ,90	1	4719	1	Chromossome	264	WP_068513917.1	69	8e-26	32.11	52	0.002	25.93	Sfp
Leptolyngbya sp. PCC 7376	GCA_000316605.1	2012-12-04	5 ,13	43 ,90	1	4578	1	Chromossome	223	WP_015136123.1	86	6e-18	25.73	63	9e-05	23.21	Sfp
Limnospira indica PCC 8005	GCA_000973065.1	2014-02-14	6 ,23	44 ,70	1	5830	1	Chromossome	232	WP_006668577.1	76	4e-20	29.38	31	6e-08	25.61	Sfp
Microcoleus sp. PCC 7113	GCA_000317515.1	2012-12-06	7 ,97	46 ,20	9	6701	1	Chromossome	247	WP_015182329.1	76	3e-30	32.82	49	0.001	23.44	Sfp
Microcystis aeruginosa NIES-2481	GCA_001704955.2	2016-08-15	4 ,44	42 ,86	2	4385	1	Chromossome	220	WP_046660671.1	63	4e-20	31.79	39	4e-06	31.82	Sfp
Microcystis aeruginosa NIES-2549	GCA_000981785.2	2015-04-29	4 ,30	42 ,90	2	4203	1	Chromossome	220	WP_046660671.1	63	4e-20	31.79	39	4e-06	31.82	Sfp
Microcystis aeruginosa NIES-843	GCA_000010625.1	2008-01-24	5 ,84	42 ,30	1	5949	1	Chromossome	220	WP_004163140.1	63	2e-19	31.13	26	7e-06	33.33	Sfp
Microcystis aeruginosa PCC 7806SL	GCA_002095975.1	2017-04-18	5 ,14	42 ,10	1	5125	1	Chromossome	220	WP_002749282.1	63	2e-19	31.13	26	4e-06	33.33	Sfp
Microcystis panniformis FACHB-1757	GCA_001264245.1	2015-08-11	5 ,69	42 ,40	1	5845	1	Chromossome	220	WP_052275727.1	63	1e-19	31.13	26	6e-06	31.82	Sfp
Microcystis sp. MC19	GCA_003019735.1	2018-03-27	5 ,02	42 ,70	1	5121	1	Chromossome	220	WP_008196866.1	63	3e-19	31.13	26	4e-06	33.33	Sfp
Microcystis viridis NIES-102	GCA_003945305.1	2018-11-22	5 ,87	42 ,40	1	6073	1	Chromossome	220	WP_125731699.1	63	3e-20	31.13	26	9e-06	31.82	Sfp
Moorea producens JHB	GCA_001854205.1	2016-10-26	9 ,38	43 ,70	3	7770	1	Chromossome	254	WP_071106092.1	77	4e-30	32.84	58	3e-05	22.03	Sfp
Moorea producens PAL-8-15-08-1	GCA_001767235.1	2016-10-18	9 ,71	43 ,50	2	7726	1	Chromossome	254	WP_070394863.1	77	2e-29	32.84	58	7e-05	21.19	Sfp
Nodularia spumigena CCY9414	GCA_000340565.3	2014-02-14	5 ,46	41 ,20	1	4896	1	Chromossome	239	WP_017804380.1	88	1e-27	30.53	25	3e-07	31.82	Sfp
Nodularia spumigena UHCC 0039	GCA_003054475.1	2018-04-17	5 ,39	41 ,26	2	4836	1	Chromossome	239	WP_017804380.1	88	1e-27	30.53	25	3e-07	31.82	Sfp
Nostoc azollae' 0708	GCA_000196515.1	2010-06-14	5 ,49	38 ,33	3	5354	1	Chromossome	239	WP_013193251.1	81	5e-22	27.75	51	9e-06	29.69	Sfp
Nostoc carneum NIES-2107	GCA_002368155.1	2017-06-24	9 ,36	40 ,71	4	7541	1	Chromossome	244	WP_096728806.1	74	6e-21	30	27	4e-05	26.67	Sfp
Nostoc commune HK-02	GCA_003990685.1	2018-04-03	8 ,23	41 ,41	9	7489	1	Chromossome	239	BBD66966.1	77	3e-26	30.15	51	6e-06	28.79	Sfp
Nostoc flagelliforme CCNUN1	GCA_002813575.1	2017-12-07	10 ,23	41 ,84	9	9746	1	Chromossome	239	WP_100900262.1	77	9e-27	31.16	51	3e-05	28.79	Sfp
Nostoc linckia NIES-25	GCA_002368035.1	2017-06-24	8 ,59	41 ,26	5	7042	1	Chromossome	239	WP_096535631.1	77	1e-26	31.16	71	3e-06	28	Sfp
Nostoc sp. ATCC 53789	GCA_009873495.1	2020-01-14	8 ,65	41 ,38	13	7263	1	Chromossome	239	WP_114080275.1	80	6e-29	32.85	65	1e-05	28.79	Sfp
Nostoc sp. CENA543	GCA_002896875.1	2018-01-24	7 ,21	40 ,80	6	6112	1	Chromossome	234	WP_103140076.1	79	4e-29	33	70	6e-05	26.67	Sfp
Nostoc sp. HK-01	GCA_003990705.1	2018-04-03	7 ,53	40 ,39	8	6534	1	Chromossome	243	BBD57743.1	87	3e-22	29.69	31	7e-05	25.61	Sfp
Nostoc sp. 'Lobaria pulmonaria (5183) cyanobiont'	GCA_002949795.1	2018-02-26	7 ,34	41 ,59	5	6516	1	Chromossome	239	WP_104905328.1	81	4e-25	29.67	51	8e-06	28.79	Sfp
Nostoc sp. NIES-2111	GCA_002368215.1	2017-06-24	7 ,88	40 ,55	10	6753	1	Chromossome	235	WP_096681606.1	79	7e-27	32.99	36	1e-05	25.33	Sfp
Nostoc sp. NIES-3756	GCA_001548375.1	2015-11-18	6 ,99	40 ,55	3	6004	1	Chromossome	235	WP_067766723.1	68	1e-26	34.13	36	2e-06	26.67	Sfp
Nostoc sp. NIES-4103	GCA_002368335.1	2017-06-24	8 ,59	41 ,18	2	6994	1	Chromossome	239	WP_096554009.1	81	3e-27	31.58	50	6e-06	28.79	Sfp
Nostoc sp. PCC 7107	GCA_000316625.1	2012-12-04	6 ,33	40 ,40	1	5449	1	Chromossome	243	WP_015112227.1	76	9e-22	30.65	41	2e-05	27.03	Sfp
Nostoc sp. PCC 7120 = FACHB-418	GCA_000009705.1	2001-11-28	7 ,21	41 ,22	7	6129	1	Chromossome	237	WP_044522635.1	58	1e-20	29.33	43	1e-05	29.51	Sfp
Nostoc sp. PCC 7524	GCA_000316645.1	2012-12-04	6 ,72	41 ,50	3	5639	1	Chromossome	234	WP_015141495.1	79	2e-28	32.16	29	5e-07	32	Sfp
Nostoc sp. 'Peltigera membranacea cyanobiont' N6	GCA_002949735.1	2018-02-26	8 ,90	41 ,35	11	7658	1	Chromossome	235	WP_104901320.1	78	7e-27	30.15	51	1e-06	29.41	Sfp
Nostoc sphaeroides CCNUC1	GCA_009372195.1	2019-10-28	9 ,52	41 ,30	9	8625	1	Chromossome	236	WP_118170366.1	83	9e-28	30.92	50	1e-05	28.79	Sfp
Nostoc sphaeroides Kutzing En	GCA_003443655.1	2018-09-04	6 ,68	41 ,58	5	5916	1	Chromossome	236	WP_118170366.1	83	9e-28	30.92	50	1e-05	28.79	Sfp
Nostocales cyanobacterium HT-58-2	GCA_002163975.1	2017-06-02	7 ,90	42 ,60	3	6596	1	Chromossome	239	WP_087538245.1	77	9e-24	29.65	75	4e-05	21.60	Sfp
Oscillatoria acuminata PCC 6304	GCA_000317105.1	2012-12-05	7 ,80	47 ,61	3	6061	1	Chromossome	245	WP_015149657.1	79	1e-33	33.5	47	0.0001	23.08	Sfp
Oscillatoria nigro-viridis PCC 7112	GCA_000317475.1	2012-12-06	8 ,27	45 ,81	6	6896	1	Chromossome	251	WP_015174718.1	87	9e-36	32.02	54	0.016	26.09	Sfp
Oscillatoriales cyanobacterium JSC-12	GCA_000309945.1	2012-11-05	5 ,53	47 ,50	1	10026	1	Chromossome	276	WP_009768265.1	88	7e-20	28.26	30	0.004	26.04	Sfp
Planktothrix agardhii NIES-204	GCA_003609755.1	2018-04-03	5 ,08	39 ,64	5	4547	1	Chromossome	249	BBD54110.1	77	8e-24	27.72	71	3e-06	29.03	Sfp
Planktothrix agardhii NIVA-CYA 126/8	GCA_000710505.1	2014-06-20	5 ,05	39 ,55	6	4537	1	Chromossome	249	WP_042156822.1	77	8e-24	27.72	71	3e-06	29.03	Sfp
Pleurocapsa sp. PCC 7327	GCA_000317025.1	2012-12-05	4 ,99	45 ,20	1	4553	1	Chromossome	237	WP_015142349.1	94	7e-35	29.26	27	0.002	30	Sfp
Prochlorococcus sp. MIT 0801	GCA_000757865.1	2014-09-25	1 ,93	34 ,90	1	2111	1	Chromossome	230	WP_081930449.1	48	3e-10	26.45	23	0.089	29.31	Sfp
Pseudanabaena sp. ABRG5-3	GCA_003967015.1	2018-01-04	5 ,66	42 ,19	8	5068	1	Chromossome	221	WP_126388077.1	82	9e-18	25.26	40	0.004	41.67	Sfp
Pseudanabaena sp. PCC 7367	GCA_000317065.1	2012-12-05	4 ,89	46 ,21	2	3952	1	Chromossome	280	WP_015166182.1	87	5e-24	26.53	32	0.0002	26.56	Sfp
Raphidiopsis curvata NIES-932	GCA_002368135.1	2017-06-24	3 ,43	40 ,50	1	3126	1	Chromossome	245	WP_096547516.1	75	2e-18	24.50	67	4e-05	23.17	Sfp
Rippkaea orientalis PCC 8801	GCA_000021805.1	2008-12-17	4 ,79	39 ,80	4	4518	1	Chromossome	238	WP_012593850.1	88	7e-26	28.86	25	1e-06	32.31	Sfp
Rippkaea orientalis PCC 8802	GCA_000024045.1	2009-08-26	4 ,80	39 ,80	5	4561	1	Chromossome	238	WP_015783151.1	88	8e-26	28.86	25	1e-06	32.31	Sfp
Rivularia sp. PCC 7116	GCA_000316665.1	2012-12-04	8 ,73	37 ,50	3	6724	1	Chromossome	268	WP_015118139.1	88	7e-22	26.84	57	0.002	25.93	Sfp
Scytonema sp. HK-05	GCA_002368235.1	2017-06-24	9 ,76	43 ,74	8	8122	1	Chromossome	239	WP_073630950.1	64	3e-21	31.48	61	3e-05	24.39	Sfp
Scytonema sp. NIES-4073	GCA_002368435.1	2017-06-24	9 ,85	43 ,43	5	8229	1	Chromossome	239	WP_096563756.1	79	9e-21	30.65	61	4e-05	22.08	Sfp
Sphaerospermopsis kisseleviana NIES-73	GCA_002368075.1	2017-06-24	5 ,61	37 ,76	2	5146	1	Chromossome	239	WP_096564931.1	81	5e-25	29.19	55	5e-05	24.69	Sfp
Stanieria cyanosphaera PCC 7437	GCA_000317575.1	2012-12-06	5 ,54	36 ,27	6	4969	1	Chromossome	260	WP_015195410.1	84	2e-24	27.43	66	4e-06	27.64	Sfp
Stanieria sp. NIES-3757	GCA_002355455.1	2016-03-05	5 ,46	36 ,55	2	4926	1	Chromossome	250	WP_096385448.1	89	2e-26	28.50	45	4e-06	31.51	Sfp
Synechococcus elongatus PCC 11802	GCA_009498715.1	2019-11-04	2 ,76	54 ,80	1	2752	1	Chromossome	259	QFZ92848.1	55	2e-09	28.57	13	0.005	22.22	Sfp
Synechococcus elongatus PCC 6301	GCA_000010065.1	2004-12-14	2 ,70	55 ,50	1	2715	1	Chromossome	259	WP_011244598.1	57	1e-11	29.88	27	0.0005	19.75	Sfp
Synechococcus elongatus PCC 7942 = FACHB-805	GCA_000012525.1	2005-11-08	2 ,74	55 ,46	2	2756	1	Chromossome	259	WP_011244598.1	57	1e-11	29.88	27	0.0005	19.75	Sfp
Synechococcus elongatus UTEX 3055	GCA_003957805.1	2018-12-21	2 ,88	55 ,13	3	2899	1	Chromossome	259	WP_126147790.1	57	1e-11	29.88	27	0.0005	19.75	Sfp
Synechococcus sp. CB0101	GCA_000179235.2	2019-04-05	2 ,79	64 ,10	1	3027	1	Chromossome	224	WP_083798520.1	62	5e-11	26.62	15	0.62	33.33	Sfp
Synechococcus sp. CC9605	GCA_000012625.1	2005-10-27	2 ,51	59 ,20	1	2756	1	Chromossome	173	WP_156783195.1	64	1e-07	28.57	55	2e-05	29.49	Sfp
Synechococcus sp. CC9902	GCA_000012505.1	2005-10-26	2 ,23	54 ,20	1	2405	1	Chromossome	194	WP_011359577.1	46	6e-07	30	15	0.043	34.38	Sfp
Synechococcus sp. JA-2-3B'a(2-13)	GCA_000013225.1	2006-02-06	3 ,05	58 ,50	1	2830	1	Chromossome	245	WP_071818151.1	68	5e-19	28.32	66	8e-05	23.71	Sfp
Synechococcus sp. JA-3-3Ab	GCA_000013205.1	2006-02-06	2 ,93	60 ,20	1	2806	1	Chromossome	215	WP_099835057.1	67	1e-23	31.58	27	0.0001	21.88	Sfp
Synechococcus sp. KORDI-100	GCA_000737535.1	2014-08-04	2 ,79	57 ,50	1	2942	1	Chromossome	144	WP_051847556.1	56	2e-07	24.39	27	0.007	36.84	Sfp
Synechococcus sp. KORDI-49	GCA_000737575.1	2014-08-04	2 ,59	61 ,40	1	2624	1	Chromossome	210	WP_052378196.1	56	6e-09	24.29	38	0.41	37.50	Sfp
Synechococcus sp. KORDI-52	GCA_000737595.1	2014-08-04	2 ,57	59 ,10	1	2708	1	Chromossome	189	WP_038553852.1	63	8e-08	28.57	34	0.0002	30.14	Sfp
Synechococcus sp. NIES-970	GCA_002356215.1	2017-02-08	3 ,12	49 ,43	5	2958	1	Chromossome	239	WP_096417775.1	80	1e-15	24.64	36	4e-07	32.81	Sfp
Synechococcus sp. PCC 11901	GCA_005577135.1	2019-05-22	3 ,47	49 ,15	6	3315	1	Chromossome	227	WP_138073588.1	65	2e-19	28.99	42	4e-07	30.67	Sfp
Synechococcus sp. PCC 6312	GCA_000316685.1	2012-12-04	3 ,72	48 ,49	2	3672	1	Chromossome	223	WP_015123806.1	36	1e-15	39.51	42	0.002	24.59	Sfp
Synechococcus sp. PCC 7002	GCA_000019485.1	2008-03-14	3 ,41	49 ,16	7	3240	1	Chromossome	227	WP_012307697_1	65	4e-18	27.38	42	3e-05	28.95	Sfp
Synechococcus sp. PCC 7003	GCA_001693255.1	2016-07-25	3 ,35	49 ,30	3	3182	1	Chromossome	227	WP_065714524.1	81	1e-19	27.86	42	2e-05	28.95	Sfp
Synechococcus sp. PCC 7117	GCA_001693275.1	2016-07-25	3 ,43	49 ,12	6	3274	1	Chromossome	227	WP_065711055.1	65	8e-20	29.59	42	3e-07	30.67	Sfp
Synechococcus sp. PCC 73109	GCA_001521855.1	2016-01-21	3 ,30	49 ,34	6	3128	1	Chromossome	227	WP_062435170.1	65	6e-20	29.59	42	1e-06	29.33	Sfp
Synechococcus sp. PCC 7336	GCA_000332275.1	2013-01-18	5 ,07	53 ,70	1	4579	1	Chromossome	144	WP_017327035.1	85	1e-16	33.06	47	0.013	27.78	Sfp
Synechococcus sp. PCC 7502	GCA_000317085.1	2012-12-05	3 ,58	40 ,60	3	3660	1	Chromossome	225	WP_015167461.1	63	2e-19	32.24	39	0.020	41.18	Sfp
Synechococcus sp. PCC 8807	GCA_001693295.1	2016-07-25	3 ,30	49 ,37	7	3183	1	Chromossome	227	WP_065716801.1	65	1e-19	28.99	42	4e-07	30.67	Sfp
Synechococcus sp. RSCCF101	GCA_008807075.1	2019-10-03	2 ,98	68 ,00	1	2886	1	Chromossome	215	WP_150883524.1	65	5e-18	32.65	7	0.013	41.18	Sfp
Synechococcus sp. SynAce01	GCA_001885215.1	2016-11-22	2 ,75	63 ,90	1	2857	1	Chromossome	243	WP_083544419.1	60	4e-25	34.42	-	-	-	Sfp
Synechococcus sp. UTEX 2973	GCA_000817325.1	2015-01-09	2 ,74	55 ,47	3	2755	1	Chromossome	259	WP_011244598.1	57	1e-11	29.88	27	0.0005	19.75	Sfp
Synechococcus sp. WH 8020	GCA_001040845.1	2015-06-26	2 ,66	53 ,10	1	2762	1	Chromossome	205	WP_053068600.1	39	3e-09	31.71	20	0.005	28.81	Sfp
Synechococcus sp. WH 8103	GCA_001182765.1	2015-07-09	2 ,43	59 ,50	1	2602	1	Chromossome	164	WP_144416704.1	49	1e-07	29.27	21	0.014	30.56	Sfp
Synechococcus sp. WH 8109	GCA_000161795.2	2014-01-09	2 ,11	60 ,10	1	2327	1	Chromossome	189	WP_025362162.1	84	4e-09	27.83	36	1e-05	29.49	Sfp
Synechocystis sp. IPPAS B-1465	GCA_003015225.1	2018-03-26	3 ,95	47 ,35	7	3733	1	Chromossome	246	WP_010873553.1	58	1e-20	29.33	43	1e-05	29.51	Sfp
Synechocystis sp. PCC 6714	GCA_000478825.2	2014-07-09	3 ,74	47 ,54	4	3495	1	Chromossome	249	WP_028947687.1	57	1e-19	29.33	24	4e-05	29.69	Sfp
Synechocystis sp. PCC 6803	GCA_000009725.1	2001-07-27	3 ,95	47 ,35	5	3710	1	Chromossome	246	WP_010873553.1	58	1e-20	29.33	43	1e-05	29.51	Sfp
Synechocystis sp. PCC 6803	GCA_000340785.1	2013-02-19	3 ,95	47 ,35	8	3711	1	Chromossome	246	WP_010873553.1	58	1e-20	29.33	43	1e-05	29.51	Sfp
Synechocystis sp. PCC 6803 (GT-G)	GCA_001318385.1	2015-10-16	3 ,57	47 ,70	1	3305	1	Chromossome	246	WP_010873553.1	58	1e-20	29.33	43	1e-05	29.51	Sfp
Synechocystis sp. PCC 6803 (GT-S)	GCA_000270265.1	2011-07-01	3 ,57	47 ,70	1	3306	1	Chromossome	246	WP_010873553.1	58	1e-20	29.33	43	1e-05	29.51	Sfp
Synechocystis sp. PCC 6803 substr. GT-I	GCA_000284135.1	2011-12-01	3 ,57	47 ,70	1	3306	1	Chromossome	246	WP_010873553.1	58	1e-20	29.33	43	1e-05	29.51	Sfp
Synechocystis sp. PCC 6803 substr. PCC-N	GCA_000284215.1	2011-12-01	3 ,57	47 ,70	1	3305	1	Chromossome	246	WP_010873553.1	58	1e-20	29.33	43	1e-05	29.51	Sfp
Synechocystis sp. PCC 6803 substr. PCC-P	GCA_000284455.1	2011-12-01	3 ,57	47 ,70	1	3304	1	Chromossome	246	WP_010873553.1	58	1e-20	29.33	43	1e-05	29.51	Sfp
Thermosynechococcus sp. CL-1	GCA_008386235.1	2019-09-16	2 ,65	53 ,50	1	2597	1	Chromossome	195	WP_149819495.1	46	1e-08	30.93	43	0.009	24.32	Sfp
Thermosynechococcus sp. NK55a	GCA_000505665.1	2013-12-11	2 ,52	53 ,80	1	2445	1	Chromossome	195	WP_024124776.1	46	4e-09	31.96	40	0.010	24.32	Sfp
Thermosynechococcus vulcanus NIES-2134	GCA_003990665.2	2017-06-24	2 ,57	53 ,90	1	2530	1	Chromossome	195	WP_011057566.1	46	4e-08	30.93	43	0.013	25.68	Sfp
Tolypothrix tenuis PCC 7101	GCA_002368295.1	2017-06-24	9 ,35	40 ,69	6	7460	1	Chromossome	244	WP_096577685.1	77	1e-19	29.80	41	2e-05	23.42	Sfp
Trichodesmium erythraeum IMS101	GCA_000014265.1	2006-07-06	7 ,75	34 ,10	1	5217	1	Chromossome	245	WP_011613965.1	88	3e-27	27.56	68	8e-05	23.93	Sfp
Trichormus variabilis ATCC 29413	GCA_000204075.1	2005-09-15	7 ,11	41 ,39	5	5941	1	Chromossome	237	WP_011319364.1	72	3e-24	32.40	28	3e-06	30.67	Sfp
Trichormus variabilis NIES-23	GCA_002368015.1	2017-06-24	7 ,47	41 ,36	6	6353	1	Chromossome	237	WP_044522635.1	72	9e-26	32.96	28	4e-06	30.67	Sfp
Acaryochloris marina MBIC11017	GCA_000018105.1	2007-10-16	8 ,36	46 ,99	10	7579	2	Chromossome	246	WP_012164270.1	77	1e-21	26.13	32	0.037	21.74	Sfp
Anabaena cylindrica PCC 7122	GCA_000317695.1	2012-12-07	7 ,06	38 ,80	7	6230	2	Chromossome	239	WP_015216311.1	73	1e-24	32.61	47	9e-05	27.78	Sfp
Calothrix sp. PCC 6303	GCA_000317435.1	2012-12-06	6 ,96	39 ,80	4	5692	2	Chromossome	247	WP_041740351.1	66	9e-26	31.40	71	0.001	29.49	Sfp
Chroococcidiopsis thermalis PCC 7203	GCA_000317125.1	2012-12-05	6 ,69	44 ,44	3	5950	2	Chromossome	269	WP_015153946.1	80	1e-32	30.63	46	5e-05	25.61	Sfp
Nostoc punctiforme PCC 73102	GCA_000020025.1	2008-04-24	9 ,06	41 ,34	6	7564	2	Chromossome	239	WP_012406868.1	77	5e-27	32.16	51	8e-06	27.94	Sfp
Prochlorococcus sp. MIT 0604	GCA_000757845.1	2014-09-25	1 ,78	31 ,20	1	1979	2	Chromossome	222	WP_052044749.1	58	2e-10	28.93	38	0.046	23.81	Sfp
Halomicronema hongdechloris C2206	GCA_002075285.3	2017-06-22	5 ,58	54 ,60	1	5115	3	Chromossome	173	WP_080811855.1	72	1e-12	30.71	17	0.16	50	Sfp
Acaryochloris marina MBIC11017	GCA_000018105.1	2007-10-16	8 ,36	46 ,99	10	7579	-	Plasmid	154	WP_012166743.1	25	0.004	30.77	72	1e-09	32.46	AcpS
Anabaena cylindrica PCC 7122	GCA_000317695.1	2012-12-07	7 ,06	38 ,80	7	6230	-	Chromossome	248	WP_015213478.1	78	5e-35	31.84	60	1e-05	23.26	Sfp
Calothrix sp. PCC 6303	GCA_000317435.1	2012-12-06	6 ,96	39 ,80	4	5692	-	Chromossome	242	WP_015200238.1	86	6e-20	27.03	50	2e-05	24.62	Sfp
Chroococcidiopsis thermalis PCC 7203	GCA_000317125.1	2012-12-05	6 ,69	44 ,44	3	5950	-	Chromossome	137	WP_015155640.1	29	0.017	34.15	59	2e-08	29.76	Sfp
Halomicronema hongdechloris C2206	GCA_002075285.3	2017-06-22	5 ,58	54 ,60	1	5115	-	Chromossome	254	WP_080809366.1	62	1e-16	33.33	61	1e-05	26.32	Sfp
Halomicronema hongdechloris C2206	GCA_002075285.3	2017-06-22	5 ,58	54 ,60	1	5115	-	Chromossome	339	WP_137455063.1	70	2e-21	27.94	29	0.009	28.57	Sfp
Nostoc punctiforme PCC 73102	GCA_000020025.1	2008-04-24	9 ,06	41 ,34	6	7564	-	Chromossome	251	WP_012408713.1	78	6e-35	31.86	63	3e-06	25.58	Sfp
Prochlorococcus sp. MIT 0604	GCA_000757845.1	2014-09-25	1 ,78	31 ,20	1	1979	-	Chromossome	218	WP_042849566.1	33	3e-09	28.40	-	-	-	Sfp
